# Supplementary material for: Advice for Health Care Professionals and Users: An Evaluation of Websites for Perinatal Anxiety
Source: PubMed Central journal article supplement (PMC6320400; doi:10.2196/11464), 2018-12-20
Supplement: mental_v5i4e11464_app1.pdf [file mental_v5i4e11464_app1.pdf]

## Appendix 1 Rating scales for information and online resources

### Information

|                                                                                                                                                                                                                                                                                                                                                                                  |
|----------------------------------------------------------------------------------------------------------------------------------------------------------------------------------------------------------------------------------------------------------------------------------------------------------------------------------------------------------------------------------|
| <b>Symptoms</b>                                                                                                                                                                                                                                                                                                                                                                  |
| Persistent, unjustified worry (general)                                                                                                                                                                                                                                                                                                                                          |
| Persistent, unjustified worry about: <ul style="list-style-type: none"> <li>o Attachment/relationship with baby</li> <li>o Maternal competence</li> <li>o Infant safety and welfare</li> <li>o Practical infant care</li> <li>o Childbirth</li> <li>o Psychosocial adjustment to motherhood</li> <li>o Support as a mother</li> <li>o Pregnancy/postpartum appearance</li> </ul> |
| Irritability                                                                                                                                                                                                                                                                                                                                                                     |
| Obsessive and intrusive negative thoughts                                                                                                                                                                                                                                                                                                                                        |
| Checking behaviours (to neutralise negative thoughts)                                                                                                                                                                                                                                                                                                                            |
| Difficulty concentrating/ 'brain fog'                                                                                                                                                                                                                                                                                                                                            |
| Sleep disturbance and/or difficulty relaxing (unrelated to baby's needs)                                                                                                                                                                                                                                                                                                         |
| Mental symptoms of panic (e.g. feeling like something terrible is about to happen)                                                                                                                                                                                                                                                                                               |
| Somatic symptoms of panic (e.g. tension, palpitations, butterflies, hyperventilating, dizziness etc)                                                                                                                                                                                                                                                                             |
| Agitation and restlessness                                                                                                                                                                                                                                                                                                                                                       |
| Avoidance of reminders of or talking about birth                                                                                                                                                                                                                                                                                                                                 |
| Disturbing images, flashbacks or nightmares about birth                                                                                                                                                                                                                                                                                                                          |
| <b>Risk factors</b>                                                                                                                                                                                                                                                                                                                                                              |
| Pre-natal mood disorder (or previous experience of mental health issues)                                                                                                                                                                                                                                                                                                         |
| 1 <sup>st</sup> time mother                                                                                                                                                                                                                                                                                                                                                      |
| Stress during pregnancy                                                                                                                                                                                                                                                                                                                                                          |
| Unplanned/unwanted pregnancy                                                                                                                                                                                                                                                                                                                                                     |
| Negative child birth experience                                                                                                                                                                                                                                                                                                                                                  |
| Infant born <27weeks, or admitted to the NICU                                                                                                                                                                                                                                                                                                                                    |
| Previous loss of (or serious complications with) child/pregnancy                                                                                                                                                                                                                                                                                                                 |
| Poor maternal self-efficacy/ low self esteem                                                                                                                                                                                                                                                                                                                                     |
| Poor social support/ relationship satisfaction                                                                                                                                                                                                                                                                                                                                   |
| Previous traumatic (or highly stressful) life events (e.g. abuse, death/illness, redundancy, relationship breakdown etc...                                                                                                                                                                                                                                                       |
| Current/past substance use (smoking, drugs, alcohol)                                                                                                                                                                                                                                                                                                                             |
| <b>Impact</b>                                                                                                                                                                                                                                                                                                                                                                    |
| <i>Impact on the mother</i>                                                                                                                                                                                                                                                                                                                                                      |
| Difficulty fulfilling family roles                                                                                                                                                                                                                                                                                                                                               |
| Diminished responsiveness to infant cues                                                                                                                                                                                                                                                                                                                                         |
| Attachment difficulties with their baby/other children                                                                                                                                                                                                                                                                                                                           |
| Fear of having another baby                                                                                                                                                                                                                                                                                                                                                      |

|                                                                             |
|-----------------------------------------------------------------------------|
| Financial worries due to inability to work                                  |
| Poor self-care, including following through with healthcare recommendations |
| Increased risk for future episodes of anxiety                               |
| Relationship issues/sexual dysfunction                                      |
| <i>Impact on the infant</i>                                                 |
| Feeding problems/reduced breastfeeding duration                             |
| Increased fussiness and sleep problems (including colic)                    |
| Adverse effects on cognitive and social development                         |
| Lower birthweight                                                           |
| Emotional and conduct problems (but not associated with hyperactivity)      |

### Available help

|                                                                                                   |
|---------------------------------------------------------------------------------------------------|
| <b>Mothers tools</b>                                                                              |
| Tests (e.g. Edinburgh Postnatal Depression Scale)                                                 |
| Myths about motherhood (dispelling unrealistic expectations of mothers)                           |
| Stigma surrounding PNI (i.e. confronting stigma and promoting help-seeking behaviour)             |
| How to gain access to/understand medical notes                                                    |
| What to say to healthcare professionals (including letters)                                       |
| How to seek help                                                                                  |
| Standard self-help (i.e. limited advice on nutrition, sleep, exercise and asking others for help) |
| Tips for family                                                                                   |
| Relaxation techniques                                                                             |
| Coping strategies                                                                                 |
| How to think (e.g. advice on positive thinking)                                                   |
| PNI issues                                                                                        |
| Prevention                                                                                        |
| Stories                                                                                           |
| <b>Mothers support</b>                                                                            |
| Forum                                                                                             |
| Email/letter                                                                                      |
| Chat                                                                                              |
| Personal messaging (a private message sent to another user in a forum or chat room)               |
| Telephone                                                                                         |
| Group meetings                                                                                    |
| Home visits                                                                                       |
| Referrals                                                                                         |
| Social media support                                                                              |
| App(s)                                                                                            |
| <b>Additional resources</b>                                                                       |
| Links                                                                                             |
| Downloads                                                                                         |
| Audio/visual                                                                                      |

|                                                         |
|---------------------------------------------------------|
| Podcasts                                                |
| Contacts                                                |
| Articles/research                                       |
| Book recommendations                                    |
| Quotes/poems                                            |
| Generic social media site (i.e. does not offer support) |
| Blogs                                                   |
| Newsletter/e-Bulletin                                   |
